# Supplementary material for: Generalized displacement of DNA- and RNA-binding factors mediates the toxicity of arginine-rich cell-penetrating peptides
Source: bioRxiv or medRxiv preprint supplement (doi:10.1101/441808), 2019-07-10
Supplement: Supplementary file [file media-1.pdf]

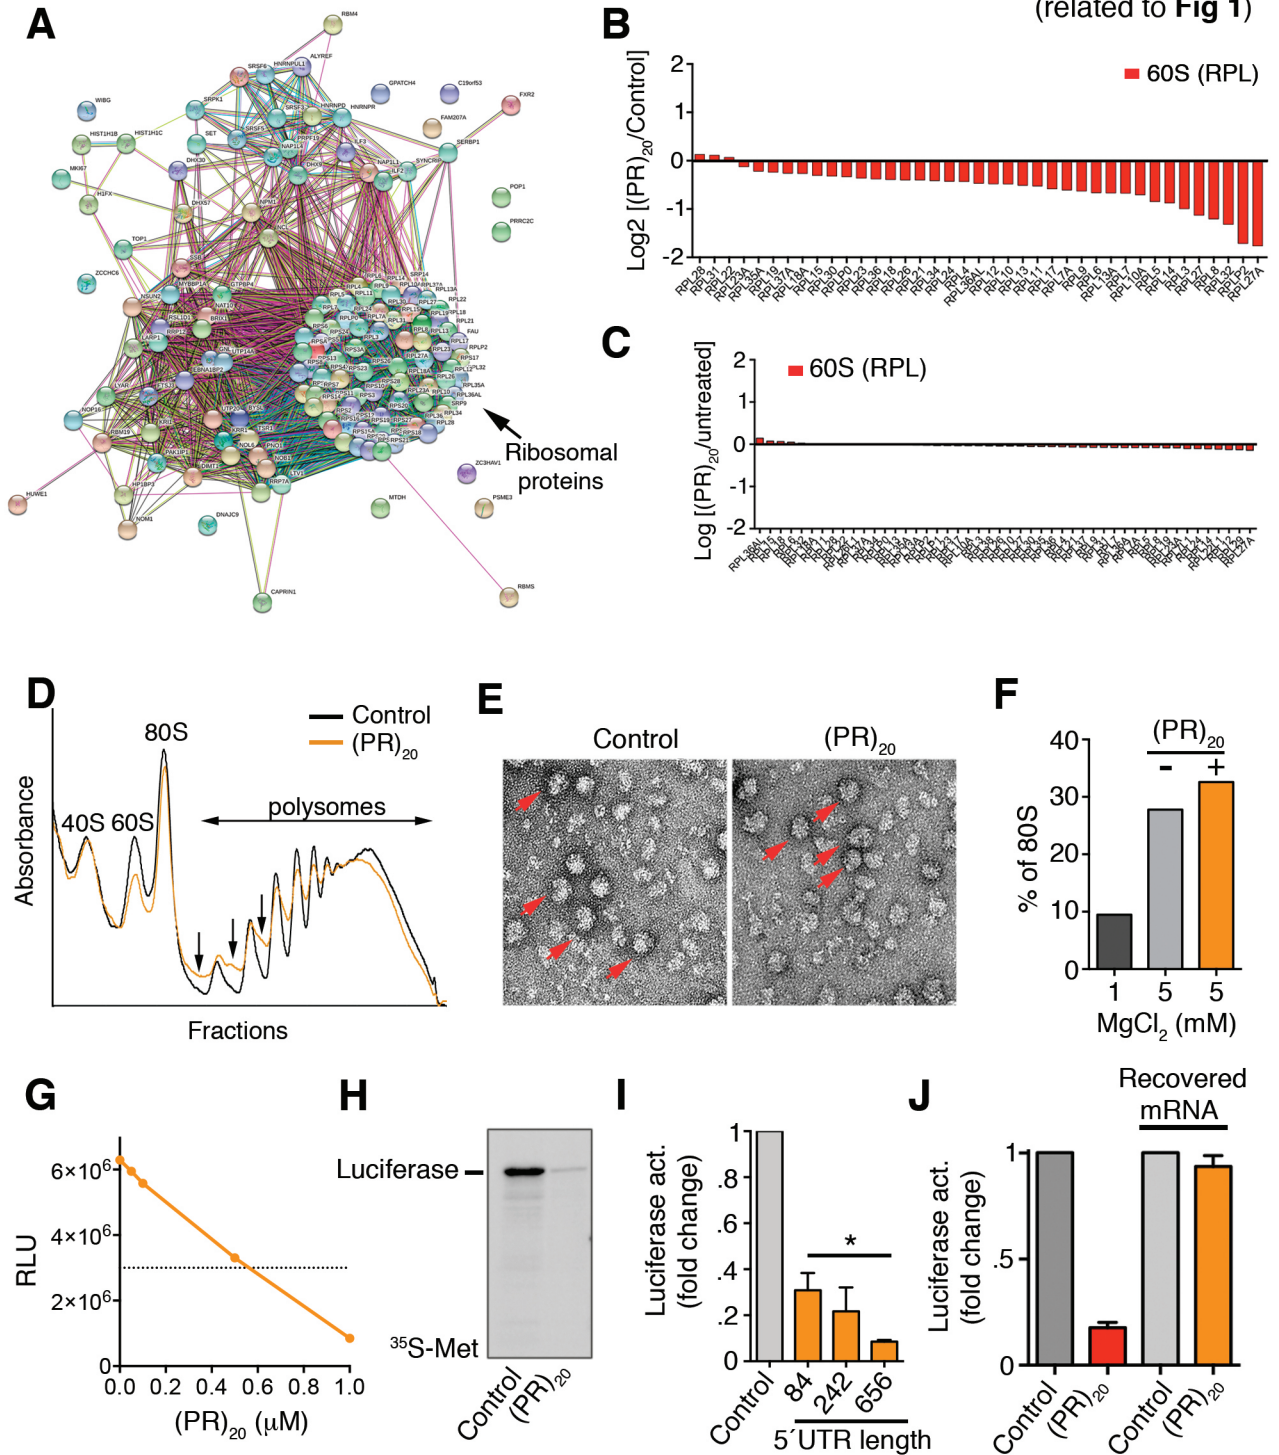

**Fig. S1.** (Related to **Fig. 1**) **(A)** STRING analysis (<https://string-db.org>) of the protein interaction networks found among the proteins identified in the purification of ribosomes from RPS9<sup>SBP</sup>-expressing HeLa cells. The node containing 60S and 40S factors (RPLs and RPSs) is indicated (arrow). The panel illustrates the ribosome composition from (PR)<sub>20</sub>-untreated cells. **(B)** Protein levels of RPL factors in ribosomes purified from HeLa RPS9<sup>SBP</sup> cells exposed to 10  $\mu$ M of (PR)<sub>20</sub> for 16h, as identified by LC-MS/MS. **(C)** Protein levels of RPL factors in the input extracts used for ribosome purification from HeLa RPS9<sup>SBP</sup> cells exposed to 10  $\mu$ M of (PR)<sub>20</sub> for 16h, as identified by LC-MS/MS. **(D)** Representative polysome profiles obtained from HeLa cells untreated or treated with 10  $\mu$ M of (PR)<sub>20</sub> for 16h. The presence of halfmers is indicated (arrows). **(E)** Electron microscopy images from purified 40S and 60S ribosomal complexes (1 pmol each) assembled *in vitro* in the presence of MgCl<sub>2</sub>, and in the presence or absence of 5 pmol of (PR)<sub>20</sub>. Assembled 80S particles are indicated (red arrows). **(F)** Quantification of 80S particles identified in **(E)** (n=1000) in non-assembly (1 mM MgCl<sub>2</sub>) or assembly (5 mM MgCl<sub>2</sub>) conditions. **(G)** *In vitro* translation of 100 ng of luciferase mRNA (quantified by Relative Luciferase Units (RLU)) in the presence of increasing doses of (PR)<sub>20</sub>. **(H)** *In vitro* translation of 100 ng of luciferase mRNA in the presence or absence of 0.5  $\mu$ M (PR)<sub>20</sub>. Translation products were labeled with [<sup>35</sup>S]-Met/Cys and analyzed by SDS-PAGE and autoradiography. **(I)** *In vitro* translation of 100 ng of luciferase mRNA with different 5' UTR lengths in the presence or absence of 0.5  $\mu$ M (PR)<sub>20</sub>. **(J)** *In vitro* translation of 100 ng of luciferase mRNA in the presence or absence of 0.5  $\mu$ M (PR)<sub>20</sub>. In the right two columns, the mRNA was extracted from a translation reaction done in the presence of the DPR, and subsequently used in a new translation reaction performed in the absence of (PR)<sub>20</sub>. \*, p<0.05.

**A**

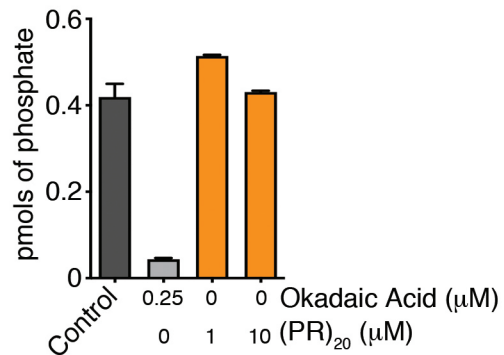

**B**

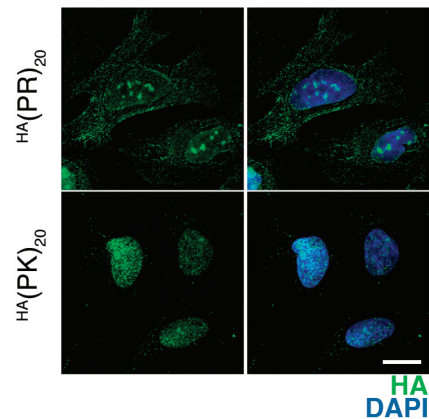

**C**

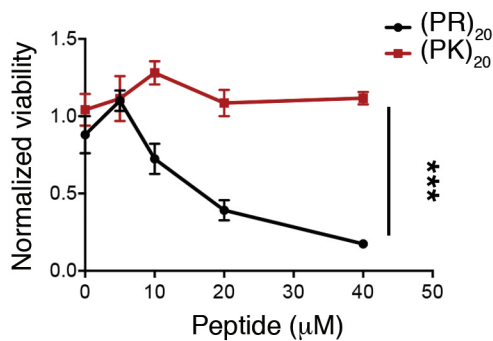

**Figure S2** (related to [Fig. 4](#)). **(A)** A PP2A in vitro phosphatase assay performed in the presence or absence of (PR)<sub>20</sub> or Okadaic acid (a phosphatase inhibitor). PP2A activity is measured through the liberation of phosphates from a KRpTIRR peptide. **(B)** Immunofluorescence of HA-(PR)<sub>20</sub> or (PK)<sub>20</sub> (green) in U2OS cells treated with 7.5 μM of each peptide for 1 h. Scale bar (white) indicates 2.5 μm. DAPI was used to stain DNA. **(C)** Percentage of viable cells as evaluated with a CellTiter-Glo luminescent assay in U2OS cells treated with increasing doses of (PR)<sub>20</sub> or (PK)<sub>20</sub> peptides at the indicated doses. \*\*\*\*, p<0.0001

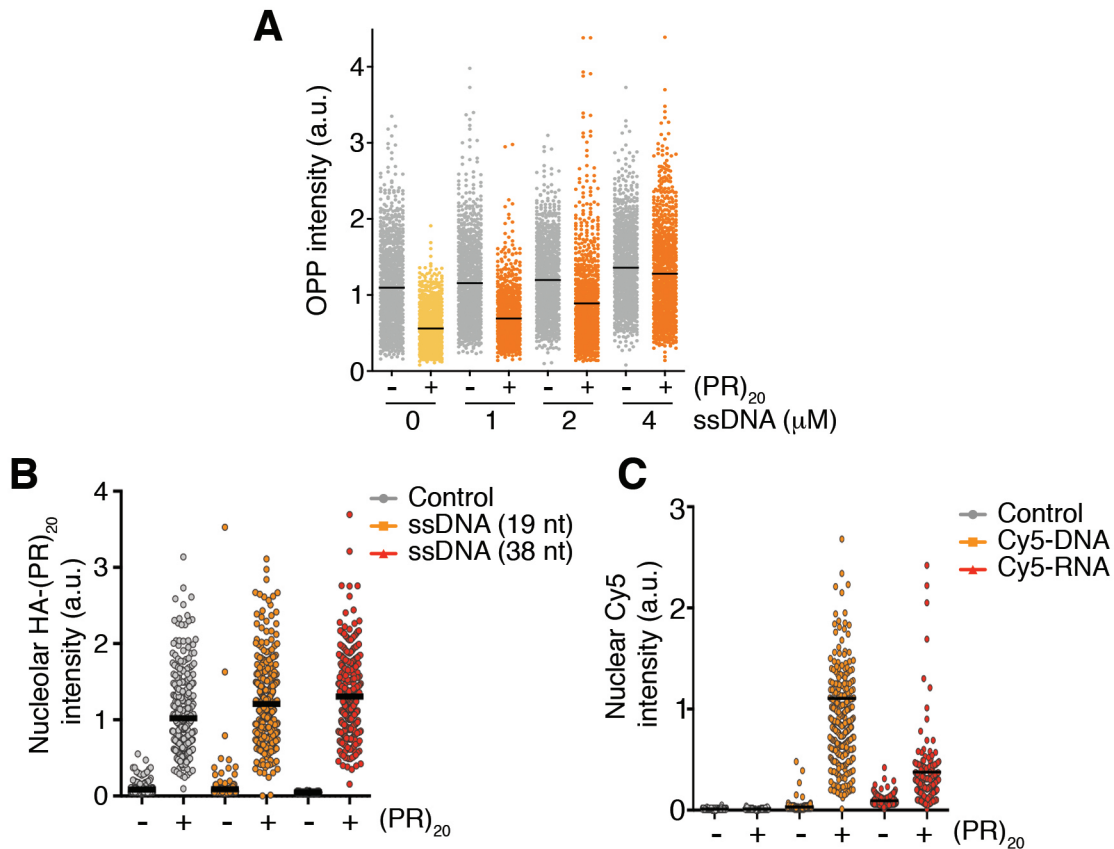

**Figure S3** (*related to Fig. 3*). **(A)** HTM-mediated quantification of OPP levels per cell (PR)<sub>20</sub> (10 μM, 16h) alone or together with a 38 nt ssDNA oligonucleotide at the indicated doses. **(B)** HTM-mediated quantification of the nucleolar levels of a HA-(PR)<sub>20</sub> peptide in U2OS cells treated with 7.5 μM HA-(PR)<sub>20</sub> alone or together with 2 μM of 19 or 38 nt ssDNA oligonucleotides for 8 h. **(C)** HTM-mediated quantification of the nuclear levels of Cy5-labeled ssDNA or ssRNA 19 nt oligonucleotides in U2OS cells treated with 7.5 μM HA-(PR)<sub>20</sub> alone or together with 4 μM of the oligonucleotides for 8 h. Black lines indicate mean values. Examples of the images used for the analysis shown in **(B, C)** are shown in **Fig. 3D, E**.

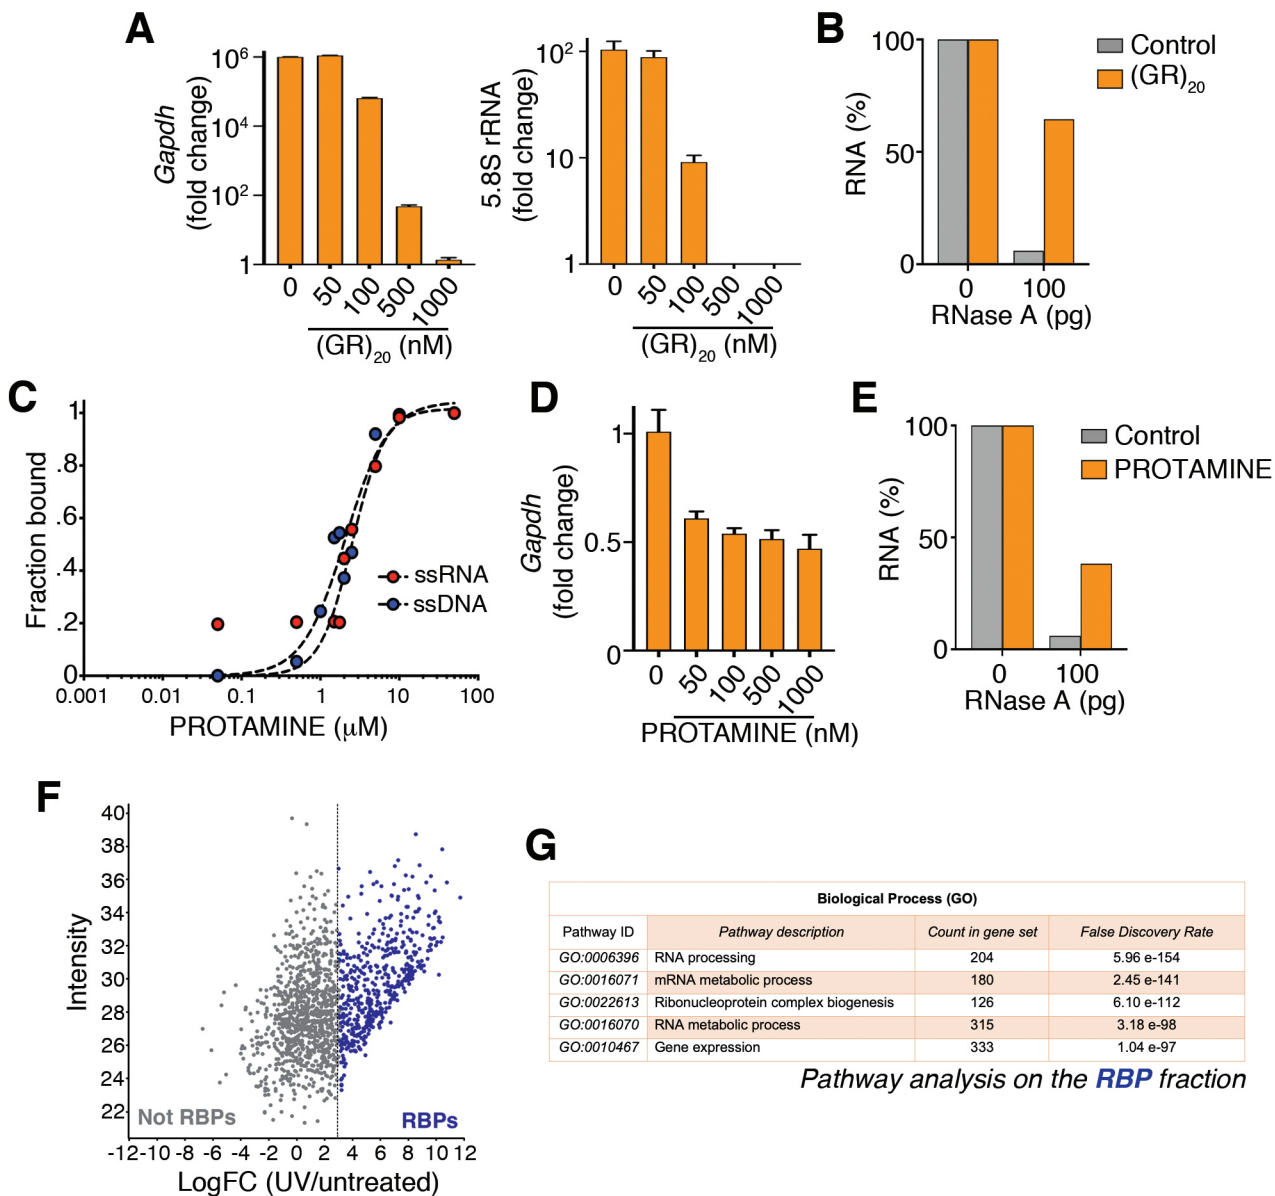

**Figure S4** (related to [Fig. 4](#)). **(A)** Percentage of *GAPDH* or 5.8 rRNA levels quantified by qPCR in reactions containing increasing doses of (GR)<sub>20</sub> (n=3). **(B)** Percentage of RNA (1 μg) remaining after a 15' digestion with 100 pg of RNase A in the presence or absence of (PR)<sub>20</sub> (5 μM). **(C)** Quantification of EMSA assays evaluating the binding of PROTAMINE to 19 nt-long ssDNA and ssRNA molecules. Each probe (0.2 μM) was incubated with increasing concentrations of (PR)<sub>20</sub> for 10'. Curve-fitting was performed using non-linear regression with the Hill equation. **(D)** Percentage of *GAPDH* levels quantified by qPCR in reactions containing increasing doses of PROTAMINE (n=3). **(E)** Percentage of RNA (1 μg) remaining after a 15' digestion with 100 pg of RNase A in the presence or absence of PROTAMINE (5 μM). **(F)** Distribution of the proteins and their levels from the proteomic analysis following isolation of mRNA-binding proteins. Proteins that showed significant enrichment on the oligo(dT)-captured fractions following UV crosslinking were identified as RBPs for subsequent analyses. **(G)** Gene Ontology (GO) analysis illustrating the biological pathways that were most significantly enriched among the proteins defined as RBPs in the proteomic experiment shown in **(F)**. Note that, indeed, all biological pathways are related to RNA metabolism.



**Table S1.** Proteins with significantly reduced levels on ribosomal fractions purified from (PR)<sub>20</sub>-treated HeLa-RPS9<sup>SBP</sup> cells. *Related to Fig 1.*

| Gene Name | Log <sub>2</sub> ((PR) <sub>20</sub> /control) |
|-----------|------------------------------------------------|
| PSME3     | -3.61                                          |
| H1FX      | -1.94                                          |
| RPL27A    | -1.76                                          |
| RPLP2     | -1.71                                          |
| BRIX1     | -1.52                                          |
| GTPBP4    | -1.35                                          |
| RPL32     | -1.32                                          |
| KRR1      | -1.22                                          |
| NAP1L4    | -1.21                                          |
| HP1BP3    | -1.20                                          |
| RPL3      | -0.99                                          |
| RPL14     | -0.87                                          |
| RPL10A    | -0.70                                          |
| RPL6      | -0.66                                          |
| UTP14A    | -0.65                                          |
| RPL9      | -0.63                                          |

**Table S2.** Proteins that show statistically significant reduced levels on chromatin after treatment of U2OS cells with (PR)<sub>20</sub> (20 μM) or PROTAMINE (30 μM). Related to **Figure 4**.

| Gen Symbol    | Log <sub>2</sub> ((PR) <sub>20</sub> /control) | Log <sub>2</sub> (PROTAMINE/control) |
|---------------|------------------------------------------------|--------------------------------------|
| FURIN         | -2.45                                          | -3.61                                |
| POTEJ         | -2.05                                          | -2.15                                |
| POTEKP        | -1.72                                          | -1.63                                |
| TMEM126B      | -1.40                                          | -1.19                                |
| POTEF         | -1.38                                          | -1.20                                |
| HIST1H1C      | -1.33                                          | -0.61                                |
| FARS2         | -1.28                                          | -0.75                                |
| HIST1H1A      | -1.27                                          | -0.46                                |
| SNX5          | -1.06                                          | -0.82                                |
| HIF0          | -1.05                                          | -0.39                                |
| PITPNA        | -1.02                                          | -0.60                                |
| PDK2          | -1.01                                          | -0.64                                |
| GLTSCR2       | -1.01                                          | -0.42                                |
| EEF1B2        | -1.01                                          | -0.86                                |
| EEF1G         | -0.98                                          | -0.75                                |
| GAPDH         | -0.97                                          | -0.80                                |
| NRF1          | -0.96                                          | -0.90                                |
| PSMF1         | -0.93                                          | -0.42                                |
| AURKC         | -0.92                                          | -0.87                                |
| CORO1B        | -0.88                                          | -0.47                                |
| EBAG9         | -0.87                                          | -0.64                                |
| APEX1         | -0.86                                          | -0.70                                |
| EEF1D         | -0.83                                          | -0.69                                |
| ALDOC         | -0.82                                          | -0.45                                |
| REPIN1        | -0.82                                          | -0.54                                |
| H2AFY         | -0.82                                          | -0.43                                |
| RXRB          | -0.75                                          | -0.50                                |
| HMGA1         | -0.75                                          | -0.68                                |
| TPT1          | -0.73                                          | -0.65                                |
| RPUSD4        | -0.72                                          | -0.87                                |
| DNAJC15       | -0.70                                          | -0.40                                |
| RING1         | -0.70                                          | -0.57                                |
| PCBP3         | -0.67                                          | -0.41                                |
| HMGA2         | -0.66                                          | -0.51                                |
| SLC25A40      | -0.65                                          | -0.41                                |
| HN1L          | -0.65                                          | -0.40                                |
| MEN1          | -0.65                                          | -0.40                                |
| MSN           | -0.64                                          | -0.58                                |
| HDGF          | -0.62                                          | -0.44                                |
| HCFC1         | -0.62                                          | -0.52                                |
| TGIF2LX       | -0.62                                          | -0.52                                |
| HMGB1;HMGB1P1 | -0.62                                          | -0.50                                |
| LRRC57        | -0.60                                          | -0.49                                |
| FLNA          | -0.60                                          | -0.50                                |
| RANBP1        | -0.60                                          | -0.59                                |
| NCKIPSD       | -0.59                                          | -0.61                                |

|          |       |       |
|----------|-------|-------|
| EZR      | -0.58 | -0.51 |
| CMSS1    | -0.58 | -0.35 |
| LANCL2   | -0.58 | -0.58 |
| CSRP2    | -0.58 | -0.48 |
| TMF1     | -0.58 | -0.44 |
| EEF1A2   | -0.56 | -0.54 |
| TARS     | -0.56 | -0.45 |
| CDYL     | -0.56 | -0.75 |
| DIDO1    | -0.55 | -0.44 |
| AHNAK    | -0.55 | -0.48 |
| ACAP2    | -0.55 | -0.39 |
| SYNGR3   | -0.55 | -0.60 |
| PALM2    | -0.55 | -0.48 |
| ARHGAP17 | -0.55 | -0.57 |
| ID1      | -0.55 | -0.39 |
| CCAR1    | -0.54 | -0.40 |
| RPL18    | -0.54 | -0.38 |
| COPS7A   | -0.54 | -0.51 |
| CCDC50   | -0.53 | -0.53 |
| ZBTB10   | -0.53 | -0.88 |
| CCNC     | -0.53 | -0.38 |
| SFSWAP   | -0.52 | -0.60 |
| SLC43A3  | -0.52 | -0.45 |
| WASF2    | -0.52 | -0.61 |
| SPR      | -0.52 | -0.74 |
| GAP43    | -0.51 | -0.97 |
| FSCN1    | -0.51 | -0.40 |
| VPS39    | -0.51 | -0.57 |
| FUS      | -0.50 | -0.46 |
| SARS     | -0.50 | -0.46 |
| FIP1L1   | -0.49 | -0.38 |
| DIAPH2   | -0.49 | -0.67 |
| CSTF2    | -0.49 | -0.40 |
| SCAF4    | -0.49 | -0.36 |
| CBX8     | -0.48 | -0.47 |
| PRPF38B  | -0.48 | -0.35 |
| DCUN1D1  | -0.47 | -0.61 |
| DDX31    | -0.47 | -0.45 |
| PDLIM7   | -0.47 | -0.41 |
| RECQL    | -0.47 | -0.36 |
| FNBP4    | -0.47 | -0.40 |
| EHD3     | -0.46 | -0.38 |
| SCAF1    | -0.46 | -0.37 |
| MRGBP    | -0.46 | -0.54 |
| MAVS     | -0.45 | -0.38 |
| CORO1C   | -0.45 | -0.55 |
| MINA     | -0.45 | -0.48 |
| COPS8    | -0.45 | -0.74 |
| TCERG1   | -0.45 | -0.42 |
| NEDD1    | -0.44 | -0.59 |
| SEPT9    | -0.44 | -0.43 |
| HDGFRP3  | -0.44 | -0.36 |
| FAHD1    | -0.44 | -0.73 |

|                 |       |       |
|-----------------|-------|-------|
| FKBP3           | -0.43 | -0.42 |
| PA2G4           | -0.43 | -0.42 |
| DDX42           | -0.43 | -0.40 |
| CASK            | -0.42 | -0.69 |
| GABPA           | -0.41 | -0.36 |
| MAD2L1BP        | -0.40 | -0.40 |
| ITPRIP          | -0.40 | -0.67 |
| EHD4            | -0.40 | -0.36 |
| NARS            | -0.39 | -0.41 |
| EEF1A1;EEF1A1P5 | -0.39 | -0.47 |
| WDR33           | -0.39 | -0.42 |
| DEK             | -0.39 | -0.44 |
| TBP             | -0.39 | -0.36 |
| DOK1            | -0.39 | -0.35 |
| IFIT2           | -0.39 | -0.72 |
| UBAP2L          | -0.38 | -0.49 |
| SEPT11          | -0.38 | -0.36 |
| RSU1            | -0.37 | -0.38 |
| NACA            | -0.37 | -0.51 |
| ORC1            | -0.37 | -0.42 |
| CCNL1           | -0.37 | -0.37 |
| CEP97           | -0.37 | -0.45 |
| UBE2I           | -0.36 | -0.42 |
| VPS13C          | -0.36 | -0.41 |
| PRDX1           | -0.36 | -0.40 |
| DR1             | -0.36 | -0.64 |
| BCL7B           | -0.35 | -0.36 |
| KDM2A           | -0.35 | -0.41 |
